# Supplementary material for: ATR protects ongoing and newly assembled DNA replication forks through distinct mechanisms
Source: PubMed Central journal article supplement — Cell Rep. Author manuscript; Available in PMC 2023 Sep 27. (PMC10529362; doi:10.1016/j.celrep.2023.112792), 2023-07-16
Supplement: NIHMS1920513-supplement-1.pdf [file NIHMS1920513-supplement-1.pdf]

**Cell Reports, Volume 42**

**Supplemental information**

**ATR protects ongoing and newly assembled**

**DNA replication forks through distinct mechanisms**

**Wendy Leung, Antoine Simoneau, Sneha Saxena, Jessica Jackson, Parasvi S. Patel, Mangsi Limbu, Alessandro Vindigni, and Lee Zou**

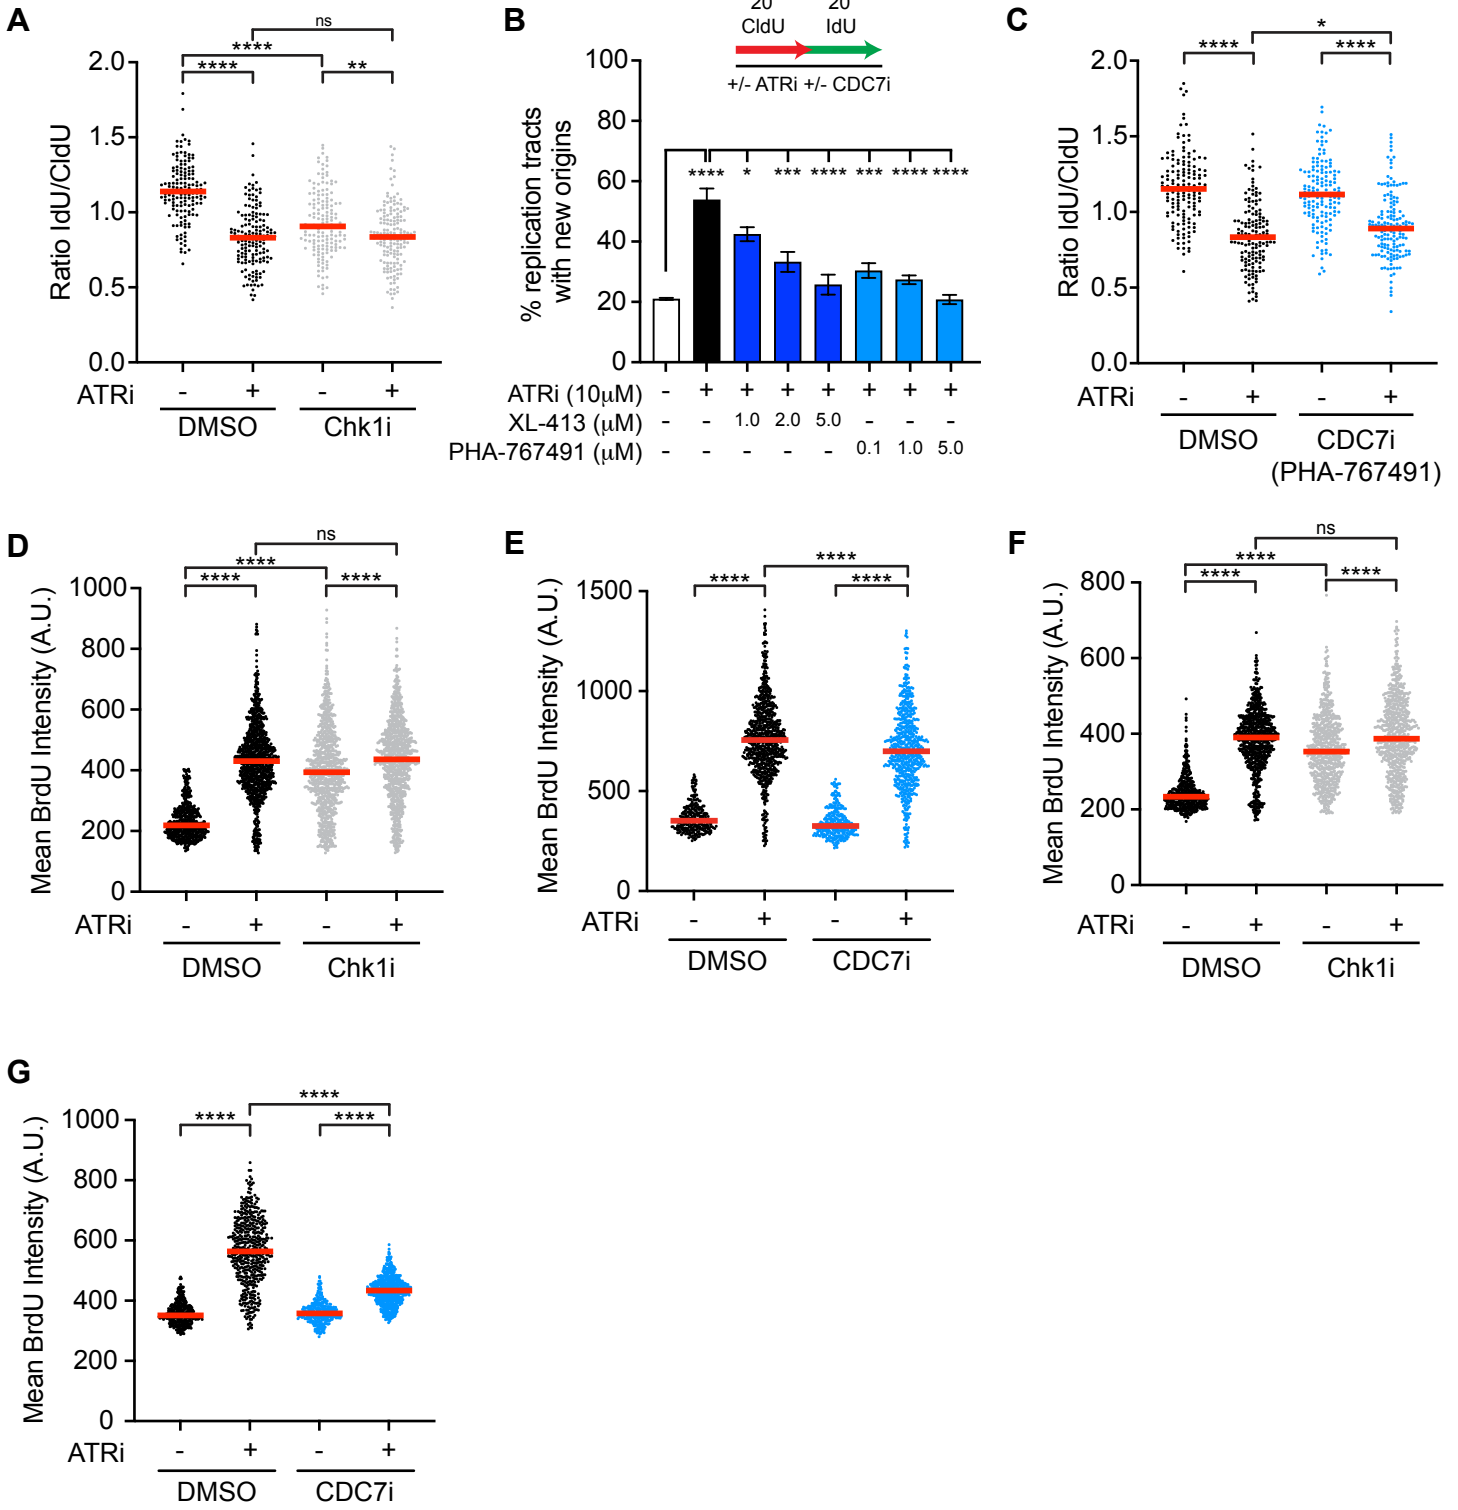

**Figure S1 (related to Figure 1). CDC7 inhibitor suppresses ATRi-induced new origin firing.**

(A) The ATR-Chk1 pathway protects against nascent strand degradation. U2OS cells were treated as in (1A) with or without ATRi (VE-821, 10  $\mu$ M) and Chk1i (MK-8776, 10  $\mu$ M). (B) Increasing concentration of CDC7i, decreases ATRi-induced new origin firing. U2OS cells were consecutively labeled with CldU (50  $\mu$ M) and IdU (100  $\mu$ M) for 20 min in the presence or absence of ATRi (VE-821, 10  $\mu$ M) and CDC7i (XL-413, 1, 2, 5  $\mu$ M; PHA-767491, 0.1, 1, 5  $\mu$ M). Cells were then processed for DNA fiber analysis of the proportion of newly fired origins (IdU Only and CldU-IdU-CldU tracts). Number (n) fibers quantified >250 across two biological replicates. Significance was calculated using one-way ANOVA with Tukey's multiple comparisons test with \*<.05, \*\*\*<.001, and \*\*\*\*<.0001. (C) CDC7i minimally impacts ATRi-induced nascent DNA degradation. U2OS cells were analyzed as in (1A) in the presence or absence of CDC7i (PHA-767491, 0.1  $\mu$ M) and ATRi (VE-821, 10  $\mu$ M). Number (n) of fibers quantified >300 across two biological replicates. Significance was calculated using Mann-Whitney Ranked Sum Test with \*<.05, \*\*<.01 and \*\*\*\*<.0001 in A and C. (D) ATR-Chk1 prevents template ssDNA exposure. U2OS cells were treated as in (1D) with or without ATRi (VE-821, 10  $\mu$ M) and Chk1i (MK-8776, 10  $\mu$ M). (E) Template ssDNA exposure occurs mainly at ongoing forks. U2OS cells were treated as in (1D) with or without ATRi (VE-821, 10  $\mu$ M) and CDC7i (PHA-767491, 0.1  $\mu$ M). Number (n) of nuclei quantified >500 across three biological replicates. Significance was calculated using Mann-Whitney Ranked Sum Test with \*\*\*\*<.0001 in D and E. (F) ATR-Chk1 pathway prevents nascent ssDNA exposure. U2OS cells were treated as in (1F) with or without ATRi (VE-821, 10  $\mu$ M) and Chk1i (MK-8776, 10  $\mu$ M). (G). Nascent ssDNA exposure occurs mainly at newly fired forks. U2OS cells were treated as in (1F) with or without ATRi (VE-821, 10  $\mu$ M) and CDC7i (PHA-767491, 0.1  $\mu$ M). Number (n) of nuclei quantified >500 across three biological replicates. Significance was calculated using Mann-Whitney Ranked Sum Test with \*\*\*\*<.0001 in F and G.

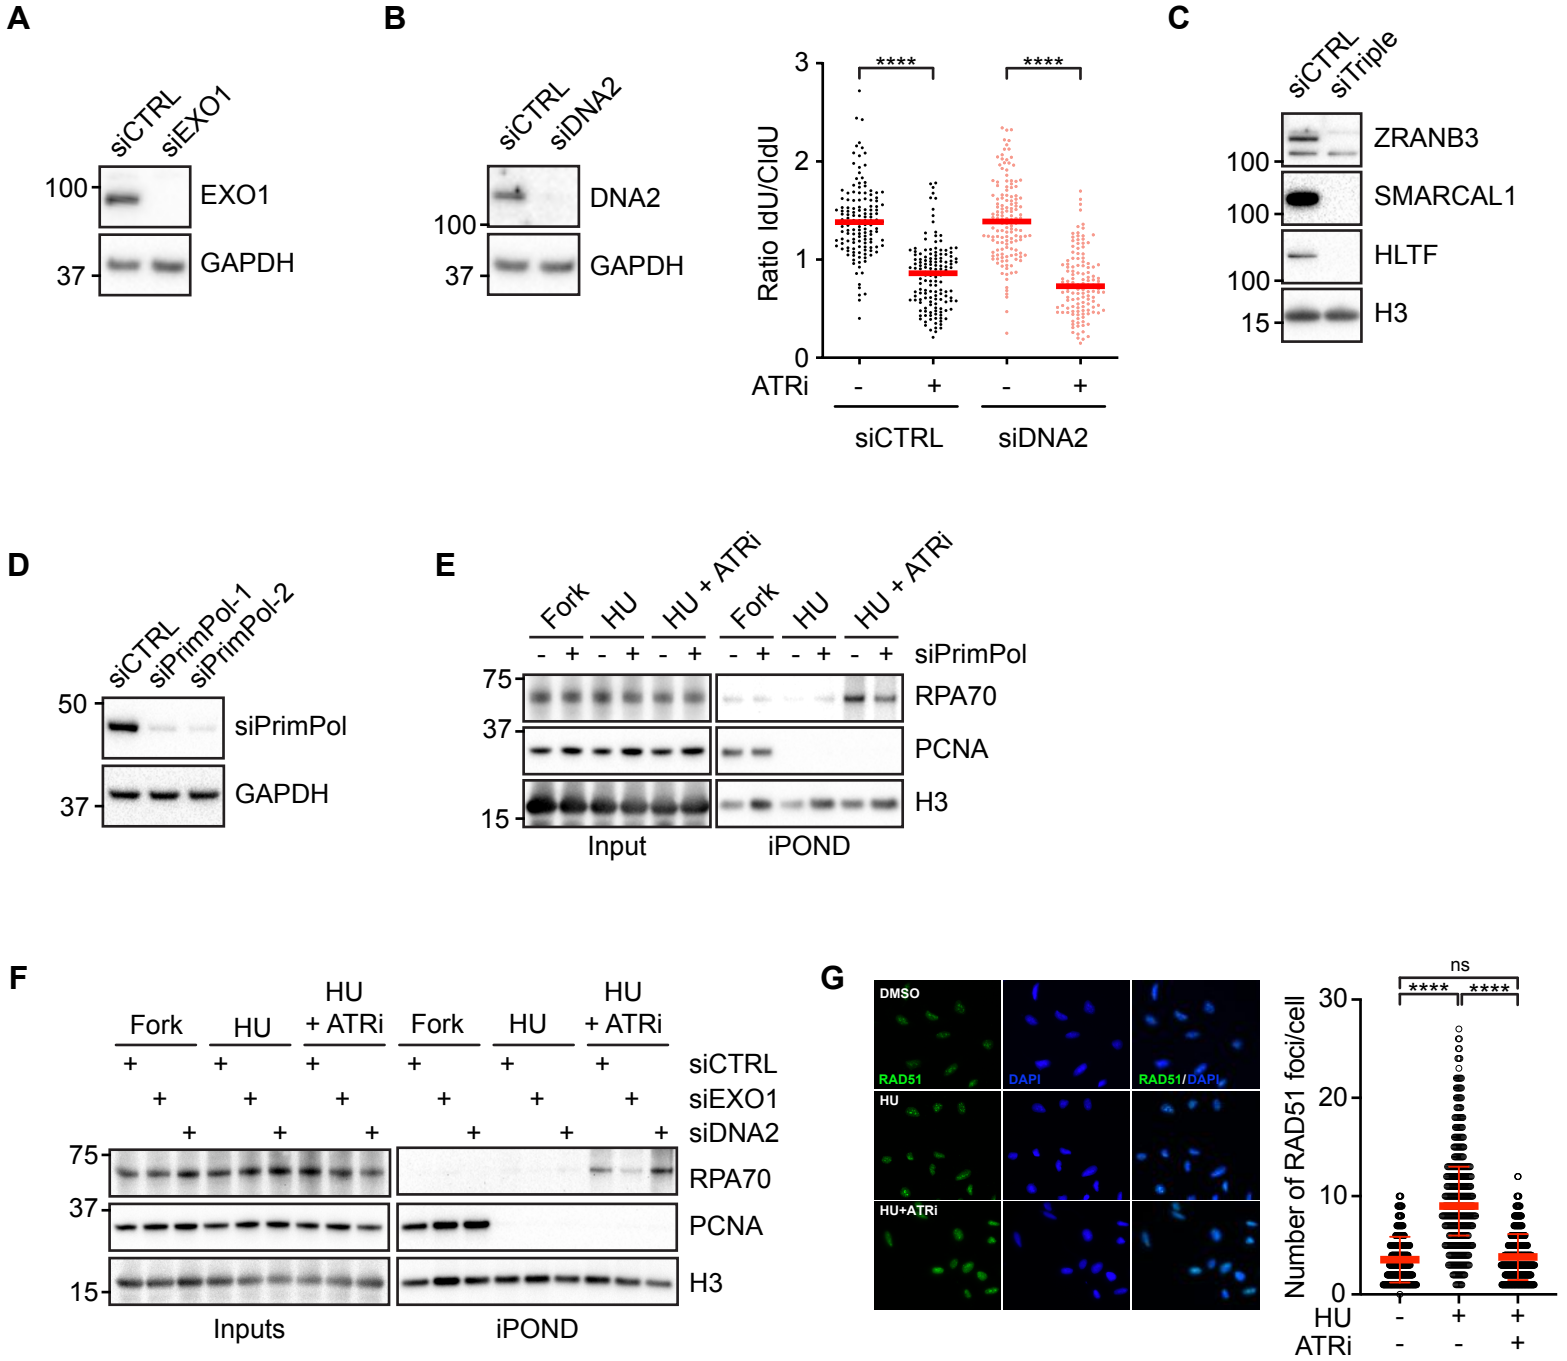



**Figure S2 (related to Figure 2). PrimPol and EXO1 contribute to the ATRi-induced ssDNA formation.**

(A) Western blot confirmation of siRNA-mediated knockdown of EXO1. (B) Western blot confirmation of siRNA-mediated knockdown of DNA2 (left) and nascent DNA degradation assay indicating that DNA2 does not influence fork protection upon ATR inhibition (right). (C) Western blot confirmation of ZRANB3, SMARCAL1, and HLTF triple knockdown. (D) Western blot confirmation of PrimPol knockdown with two different siRNAs. (E-F) PrimPol and EXO1 are required for ATRi-induced RPA loading on ssDNA at stressed replication forks. HEK293T cells were labeled with 10  $\mu$ M EdU for 15 min and either directly fixed with formaldehyde (fork) or exposed to HU (4 mM) for 5 h with or without ATRi (VE-821, 10  $\mu$ M) prior to fixation. Samples were then processed for iPOND and enriched proteins were analyzed by western blotting. (G) ATR protects against nuclease-dependent nascent strand degradation by recruiting RAD51. U2OS cells were treated with HU (4 mM) with or without ATRi (VE-821, 10  $\mu$ M) for 5 h prior to immunofluorescent staining with RAD51. Number (n) of nuclei quantified >400 across three biological replicates. Significance was calculated using Kruskal-Wallis test with Dunn's multiple comparisons test with \*\*\*\*<.0001.

A

| % Reversed Forks (total # molecules analyzed) |           |            |           |              |            |                   |                     |                            |
|-----------------------------------------------|-----------|------------|-----------|--------------|------------|-------------------|---------------------|----------------------------|
| U2OS                                          | NT        | +HU        | +ATRi     | +HU<br>+ATRi | +siPrimPol | +HU<br>+siPrimPol | +ATRi<br>+siPrimPol | +HU<br>+ATRi<br>+siPrimPol |
| <b>Experiment #1</b>                          | 4<br>(81) | 28<br>(78) | 6<br>(95) | 15<br>(89)   | 6<br>(87)  | 27<br>(81)        | 6<br>(96)           | 26<br>(77)                 |
| <b>Experiment #2</b>                          | 4<br>(73) | 23<br>(80) | 5<br>(82) | 13<br>(83)   | 5<br>(60)  | 21<br>(80)        | 7<br>(87)           | 21<br>(76)                 |

B

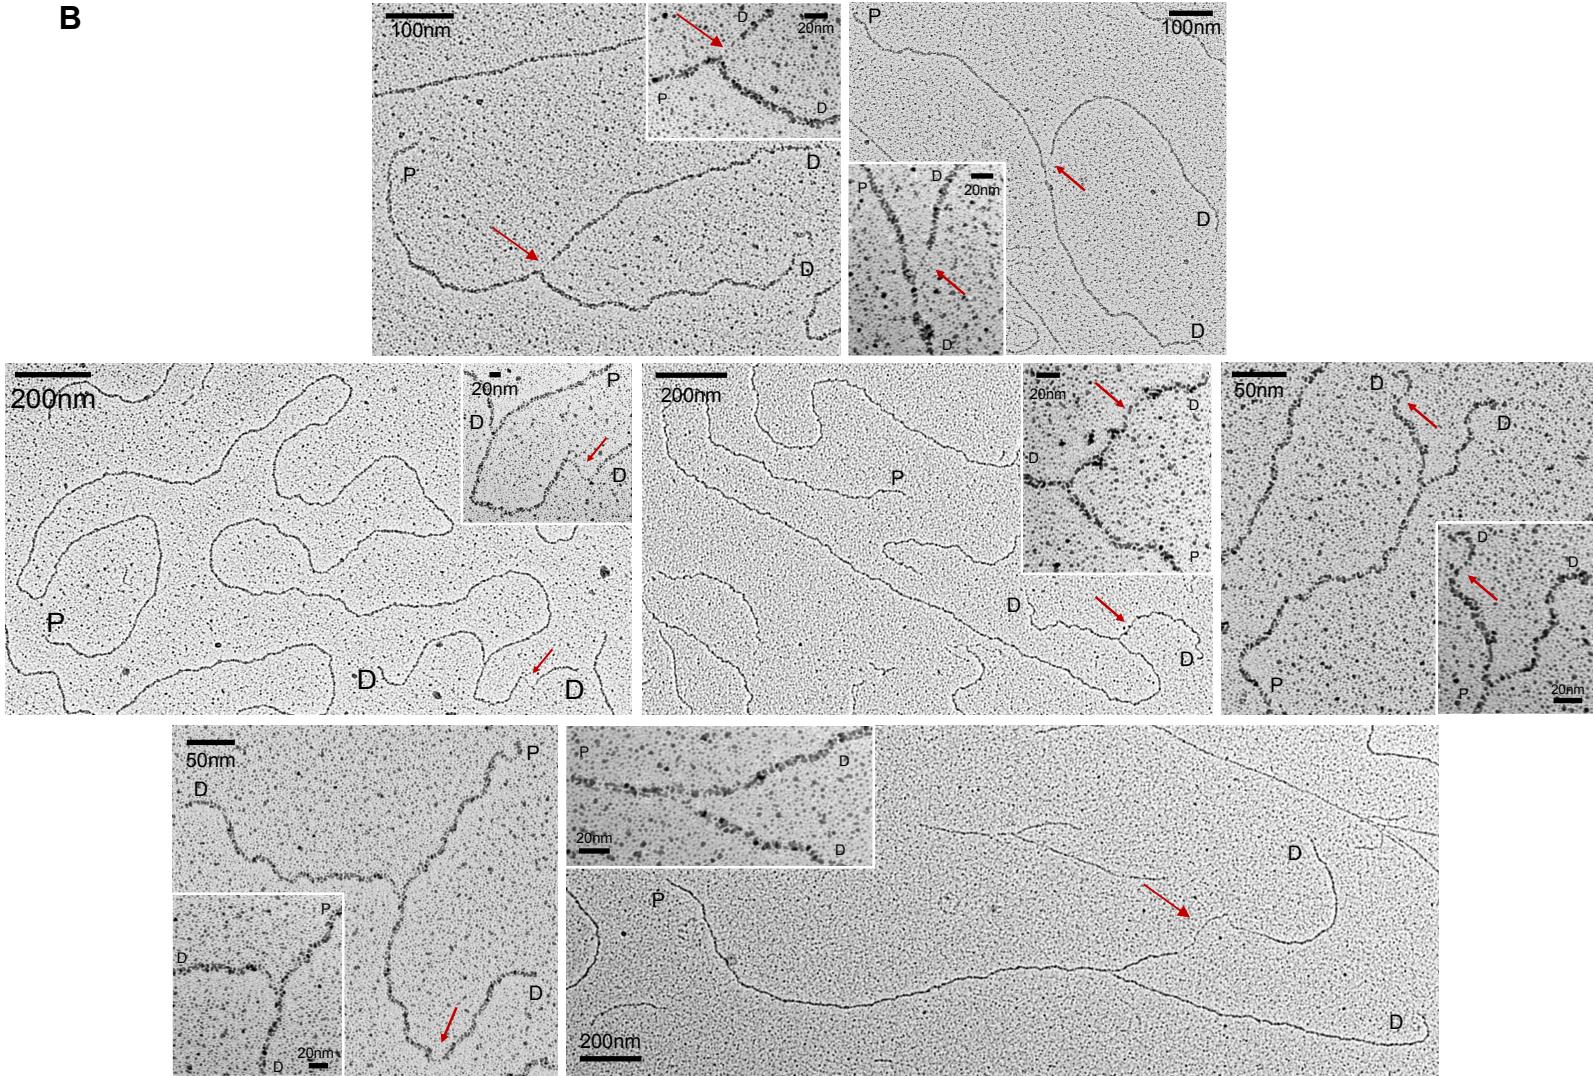

**Figure S3 (related to Figure. 3). Electron microscopy (EM) data**

(A) Percentage of reversed replication forks observed in two independent EM experiments for samples in Figure 3C. (B) Seven additional EM images of replication forks with ssDNA gaps in cells treated with HU and ATRi. Insets show the magnified fork junctions. Red arrows show the location of the ssDNA gaps. P, parental strand; D, daughter strand; Red arrow, ssDNA. Junction gaps (Top); Daughter strand gaps (Middle and bottom).

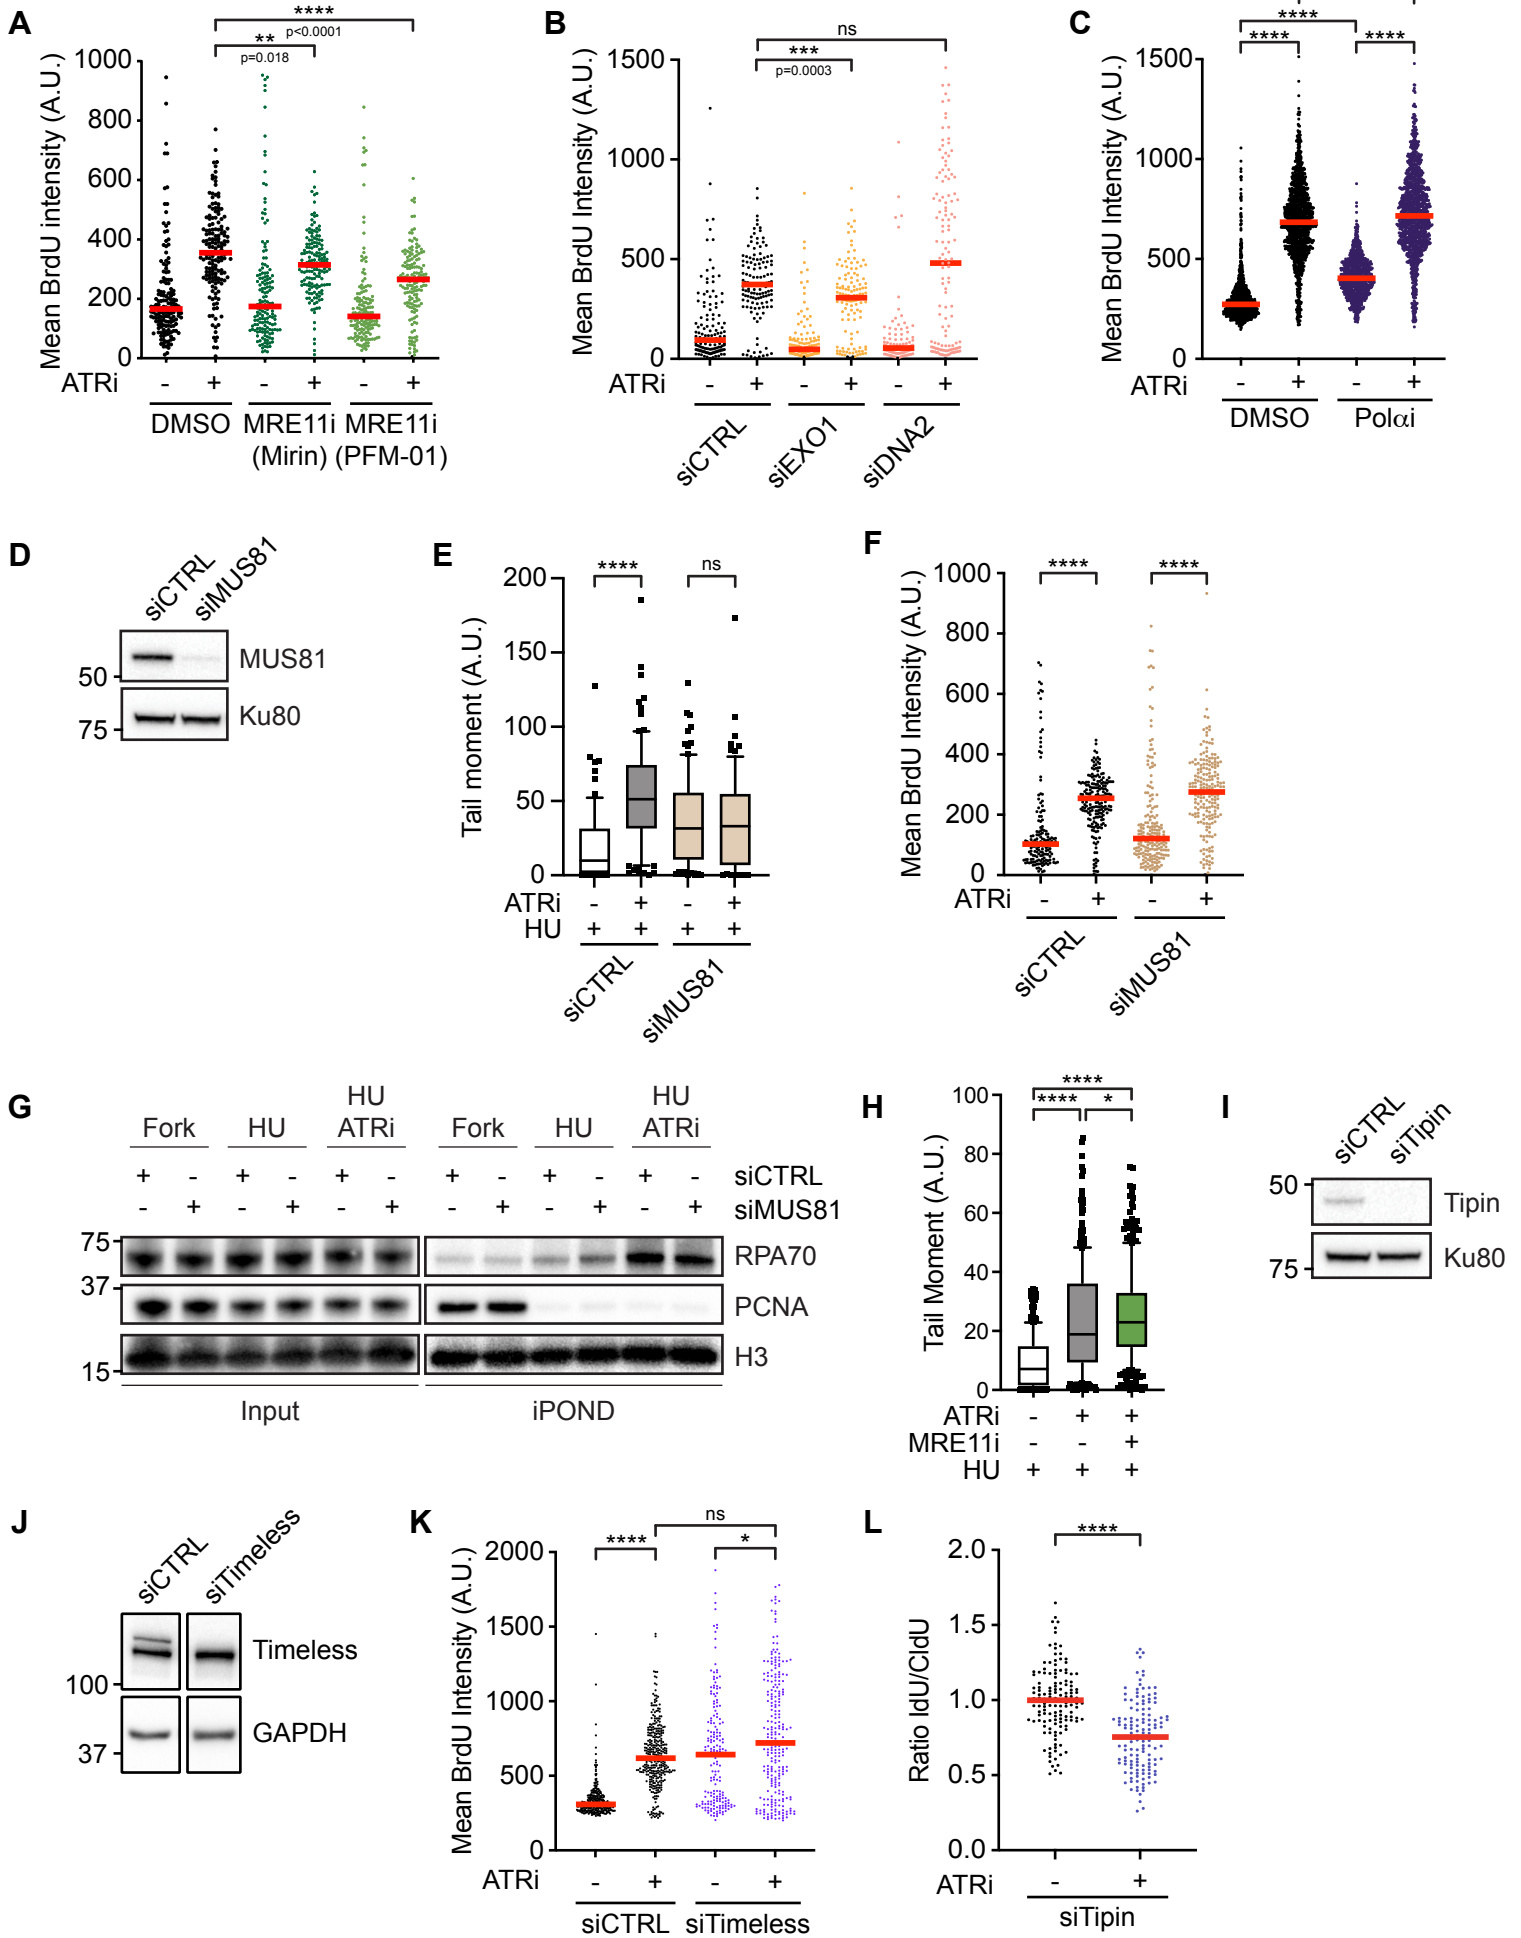



**Figure S4 (related to Figure 4). Testing the effects of MUS81 and Timeless depletion on the ATRi-induced template ssDNA exposure.**

**(A)** The exonuclease and endonuclease activity of MRE11 partially contribute to the exposure of template ssDNA in the presence of HU and ATRi. Cells were treated as in (4A) with MRE11i (Mirin, 50  $\mu$ M or PFM-01, 100  $\mu$ M) with or without ATRi (VE-821, 10  $\mu$ M). Number (n) of nuclei quantified >150 in each sample across two biological replicates. Significance was calculated using Mann-Whitney Ranked Sum Test with \*\*<.01, \*\*\*\*<.0001. **(B)** EXO1 but not DNA2 partially contribute to template DNA exposure at stressed replication forks. Cells were treated as in (4A) with or without ATRi (VE-821, 10  $\mu$ M) following 48 h siRNA knockdown of EXO1 or DNA2. Number (n) of nuclei quantified >100 in each sample across two biological replicates. Significance was calculated using Mann-Whitney Ranked Sum Test with \*\*\*<.001. **(C)** Loss of DNA polymerase  $\alpha$  partially contributes to the exposure of template ssDNA. Cells were treated as in (4A) with CD437 (2.5  $\mu$ M) with or without ATRi (VE-821, 10  $\mu$ M). Number (n) of nuclei quantified >800 in each sample across three biological replicates. Significance was calculated using Mann-Whitney Ranked Sum Test with \*<.05, \*\*\*\*<.0001. **(D)** Western blot confirmation of siRNA-mediated knockdown of MUS81. **(E-G)** MUS81-mediated double-strand breaks are not responsible for excessive template DNA exposure and ssDNA generated at stressed replication forks upon ATR inhibition. Cells were exposed to HU (4 mM) and ATRi (VE-821, 10  $\mu$ M) for 5 h and processed for neutral comet assay in (E). Box plots represent the tail moment of comets. Number (n) of cells quantified >100 in each sample across two biological replicates. Significance was calculated using Mann-Whitney Ranked Sum Test with \*\*\*\*<.0001. Cells were treated with or without ATRi (VE-821, 10  $\mu$ M) following 48 h siRNA knockdown of MUS81 and processed for the template strand exposure assay in (F). Number (n) of nuclei quantified >150 in each sample across two biological replicates. Significance was calculated using Mann-Whitney Ranked Sum Test with \*\*\*\*<.0001. HEK293T cells were labeled with 10  $\mu$ M EdU for 15 min and either directly fixed with formaldehyde (fork) or exposed to HU for 5 h with or without ATRi (VE-821, 10  $\mu$ M) prior to fixation. Samples were then process for iPOND and enriched proteins were analyzed by western blotting in (G). **(H)** The endonuclease activity of MRE11 does not contribute to template ssDNA exposure through

generating DSBs. Cells were exposed to HU (4 mM) with or without ATRi (VE-821, 10  $\mu$ M) and MRE11i (PFM-01, 100  $\mu$ M) for 5 h and processed for neutral comet assay. Box plots represent the tail moment of comets. Number (n) of cells quantified >250 in each sample across two biological replicates. Significance was calculated using Mann-Whitney Ranked Sum Test with  $* < .05$ ,  $**** < .0001$ . (I) Western blot confirmation of siRNA-mediated knockdown of Tipin. (J) Western blot confirmation of siRNA-mediated knockdown of Timeless. (K) ATRi and Timeless depletion promote template ssDNA exposure through the same mechanism. U2OS cells were treated with or without ATRi (VE-821, 10  $\mu$ M) following 48 h siRNA knockdown of Timeless (0.5 nM) and processed for the template strand exposure assay. Number (n) of nuclei quantified >250 in each sample across two biological replicates. Significance was calculated using Mann-Whitney Ranked Sum Test with  $* < .05$ ,  $**** < .0001$ . (L) Loss of Tipin increases nascent strand degradation. Cells were treated as in (2A) with or without ATRi (VE-821, 10  $\mu$ M) following 48 h siRNA knockdown of Tipin. Number (n) of fibers quantified >250 in each sample across three biological replicates. Significance was calculated using Mann-Whitney Ranked Sum Test with  $**** < .0001$ .

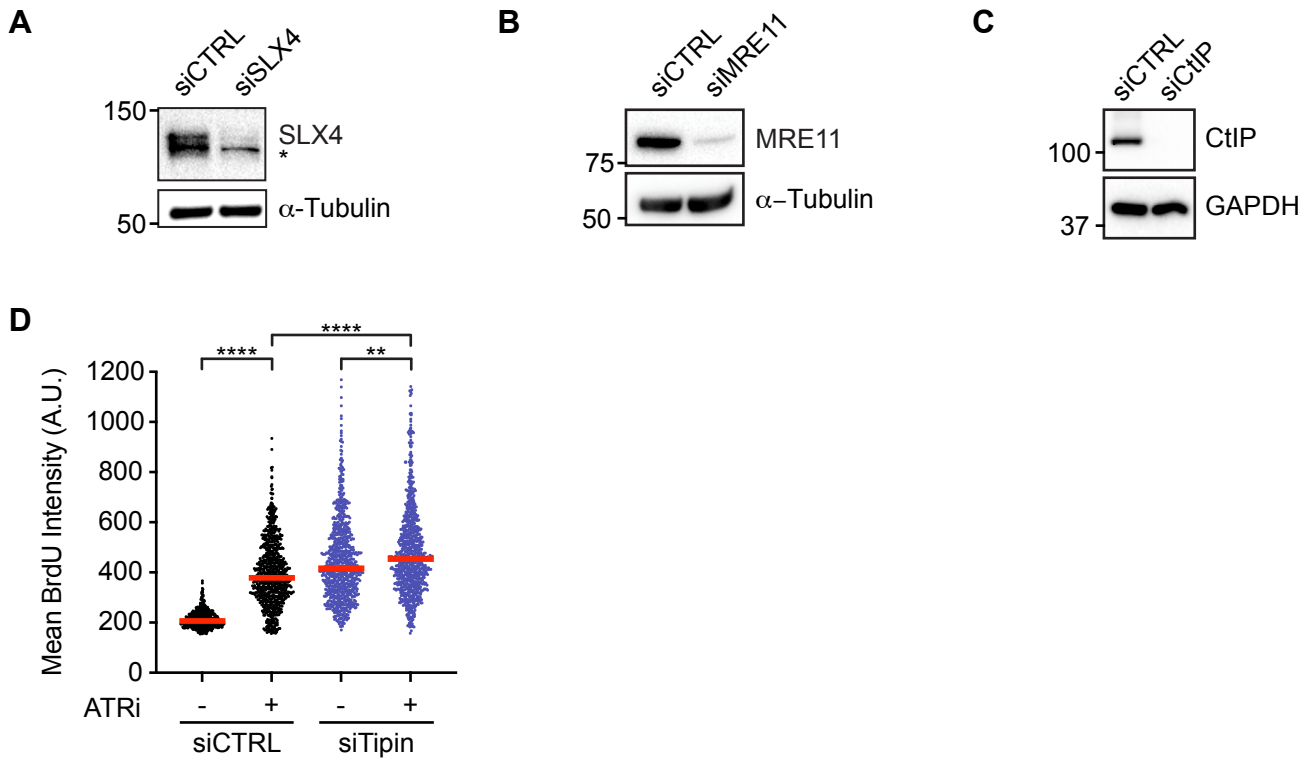

**Figure S5 (related to Figure 5). Confirmation of SLX4, MRE11, and CtIP knockdown.**

**(A-C)** Western blot confirmation of siRNA-mediated knockdown of SLX4 (A), MRE11 (B), and CtIP (C).

**(D)** Fork uncoupling due to loss of Tipin contributes to nascent ssDNA exposure. Cells were treated as in (5A) with or without ATRi (VE-821, 10  $\mu$ M) following 48 h siRNA knockdown of Tipin. Number (n) of nuclei quantified >500 across three biological replicates. Significance was calculated using Mann-Whitney Ranked Sum Test with \*\*<.01, \*\*\*\*<.0001.





**Figure S6 (related to Figure 6). Fork reversal is not required for ATRi-induced nascent DNA degradation from PARPi-induced ssDNA gaps**

(A-B) ATRi-induced nascent DNA degradation in PARPi-treated cells is independent of fork reversal in U2OS (A), BRCA1-deficient UWB1 and UWB1 complemented with wild-type BRCA1 (UWB1+B1) cells (B). Cells were sequentially labeled in CldU (50  $\mu$ M) followed by IdU (100  $\mu$ M) in the presence of PARPi (Olaparib, 10  $\mu$ M). Cells were then incubated in media containing PARPi (Olaparib, 10  $\mu$ M) with or without ATRi (VE-821, 10  $\mu$ M) for 5 h following 48 h knockdown of HLTF, SMARCAL1, and ZRANB3 (siTriple) and processed for fiber assay analysis. (C) Western blot confirmation of siRNA-mediated knockdown of BRCA2 and PrimPol. (D) Inhibition of ATR enhances nascent DNA degradation in BRCA2-deficient cells. U2OS cells were sequentially labeled in CldU (50  $\mu$ M) followed by IdU (100  $\mu$ M) in the presence of PARPi (Olaparib, 10  $\mu$ M). Cells were then incubated in media containing DMSO or PARPi (Olaparib, 10  $\mu$ M) with or without ATRi (VE821, 10  $\mu$ M) for 5 h and processed for fiber assay analysis following 48 h knockdown of BRCA2. (E) Inhibition of ATR increases ssDNA gaps at forks generated by PrimPol in BRCA2-deficient cells. U2OS cells were sequentially labeled in CldU (50  $\mu$ M) followed by IdU (100  $\mu$ M) in the presence of PARPi (Olaparib, 10  $\mu$ M). Cells were then incubated in media containing PARPi (Olaparib, 10  $\mu$ M) with or without ATRi (VE-821, 10  $\mu$ M) for 1 h followed by S1 nuclease digestion and processed for fiber assay analysis following 48 h knockdown of BRCA2 and PrimPol. Number (n) of fibers quantified >250 across two biological replicates. Significance was calculated using Mann-Whitney Ranked Sum Test with \*\*<.01, \*\*\*<.001, \*\*\*\*<.0001 in D-E. (F) ATRi-induced nascent DNA degradation in PARPi-treated cells is independent of fork reversal in BRCA1-deficient, PARPi-resistant SYr12 and SYr13 cells. Cells were sequentially labeled in CldU (50  $\mu$ M) followed by IdU (100  $\mu$ M) in the presence of PARPi (Olaparib, 10  $\mu$ M). Cells were then incubated in media containing PARPi (Olaparib, 10  $\mu$ M) with or without ATRi (VE-821, 10  $\mu$ M) for 5 h following 48 h knockdown of HLTF, SMARCAL1, and ZRANB3 (siTriple) and processed for fiber assay analysis. Number (n) of fibers quantified >300 across two biological replicates. Significance was calculated using Mann-Whitney Ranked Sum Test with \*<.05, \*\*\*\*<.0001 in A-B and F.

---

Table S1. A list of the siRNAs used in this study

---

|               |                                               |
|---------------|-----------------------------------------------|
| BRCA2         | GGAUUUAUACAUAUUUCGCATT                        |
| Control siRNA | Silencer Negative Control No.1 siRNA, 4404021 |
| CtIP          | GCUAAAACAGGAACGAAUCTT                         |
| DNA2          | GAGUCACAAUCGAAGGAUATT                         |
| EXO1          | GCCUGAGAAUAAUAUGUCUTT                         |
| HLTF          | GGAUAUAAUGUUAACGAUTT                          |
| MRE11         | CCAAAAGACAUUAUCCAUUTT                         |
| MUS81         | CAGCCCUGGUGGAUCGAUA                           |
| PrimPol-1     | GAAGAGCCCAUAAGAGUAATT                         |
| PrimPol-2     | GAGACUAUUUCAUCGACAATT                         |
| SMARCAL1      | AGAGAGAAGUUUUUAGUAUTT                         |
| SLX4          | AAACGUGAAUGAAGCAGAA                           |
| TIMELESS      | GCAGCAUGAUGAGACCUAUTT                         |
| TIPIN         | GCAAAGCUGCUGAGUAAUATT                         |
| ZRANB3        | GACUCGUUACAUAUAGGAUATT                        |

---
